# Supplementary material for: Nanoporous silicon prepared through air-oxidation demagnesiation of Mg2Si and properties of its lithium ion batteries
Source: Royal Society of Chemistry journal article supplement (doi:10.1039/c5cc01659b), 2015-01-01
Supplement: c5cc01659b1.pdf [file c5cc01659b1.pdf]

## Supporting Information

### Method:

**Materials:** Mg (99%, 200 mesh powder), HCl (37%) and commercial Si (99.5%, 200 mesh) were purchased from Sinopharm Chemical Reagent Co., Ltd (China).

**Nano-silicon preparation process:** Typically, 11.2 g of commercial bulk Si and 20.2 g of Mg were mixed and added into a 50 mL stainless autoclave before sealed. The Si:Mg molar ratio was 1:2.1, which was slightly in excess of Mg (5%), considering the complete reduction of Si into Mg<sub>2</sub>Si. Subsequently, the autoclave was maintained at 500 °C for 10 h and cooled to room temperature to prepare the Mg<sub>2</sub>Si/Mg. Then the Mg<sub>2</sub>Si/Mg powder was heated at 600 °C under the air atmosphere for 10 h. heating at 600 °C led to the oxidation of Mg<sub>2</sub>Si into Si/MgO and the excess Mg into MgO. The as-resulting production was immersed in hydrochloric acid (1 M) for 30 minute to remove MgO. The resultant solution was washed with distilled water and the brown-black precipitate was collected by filter, washed with deionized water and ethanol and dried for overnight at 60 °C in vacuum oven. The mass of the final nano-silicon production is above 10 g, which means the yield of nano-silicon from the sand conversion is above 90%. The percentage yields of this nanoporous silicon material are calculated in supporting information and several repeated experiments have been tested (**Table S1**).

**Material Characterization:** The morphology of the materials were characterized by scanning electron microscopy (SEM, JEOL-JSM-6700F), Transmission electron microsocopy (TEM, Hitachi H7650 and HRTEM, JEOL 2010). X-ray diffraction (XRD) was performed on a Philips X' Pert Super diffract meter with Cu K $\alpha$  radiation ( $\lambda=1.54178$  Å).

The Brunauer- Emmett-Teller (BET) surface area and Barrett-Joyner-Halenda (BJH) pore distribution plots were measured on a Micromeritics ASAP 2020 accelerated surface area and porosimetry system. The tap density were measured on a JZ-1 powder tap density meter (Chengdu Jingxin Powder Analyse Instrument Co.,LTD). Before measurement, the samples were allowed to dry under vacuum at 110 °C for 3h.

***Electrochemical Measurement:*** The electrochemical properties of nano-silicon electrodes were measured with coin-type half cells (2016 R-type) which assemble under an argon-filled glove box ( $\text{H}_2\text{O}$ ,  $\text{O}_2 < 1$  ppm). Working electrode was prepared by mixing the nano-silicon material, super P carbon black and sodium alginate (SA) binder in a weight ratio of 60:20:20 in water solvent. The slurry was pasted onto a Cu foil and then dried in a vacuum oven at 80 °C for 12 h. The active material density of each cell was determined to be 0.7-1.2 mg  $\text{cm}^{-2}$ . Metallic Li sheet was used as counter electrode, and 1 M  $\text{LiPF}_6$  in a mixture of ethylene carbonate/dimethylcarbonate (EC/DMC; 1:1 by Volume, Zhuhai Smoothway Electronic Materials Co., Ltd (china). Galvanostatic measurements were made using a LAND-CT2001A instrument at room temperature that was cycled between 0.005 V and 1.50 V versus  $\text{Li}^+/\text{Li}$  at a rate of 0.36 A  $\text{g}^{-1}$  to 36 A  $\text{g}^{-1}$ .

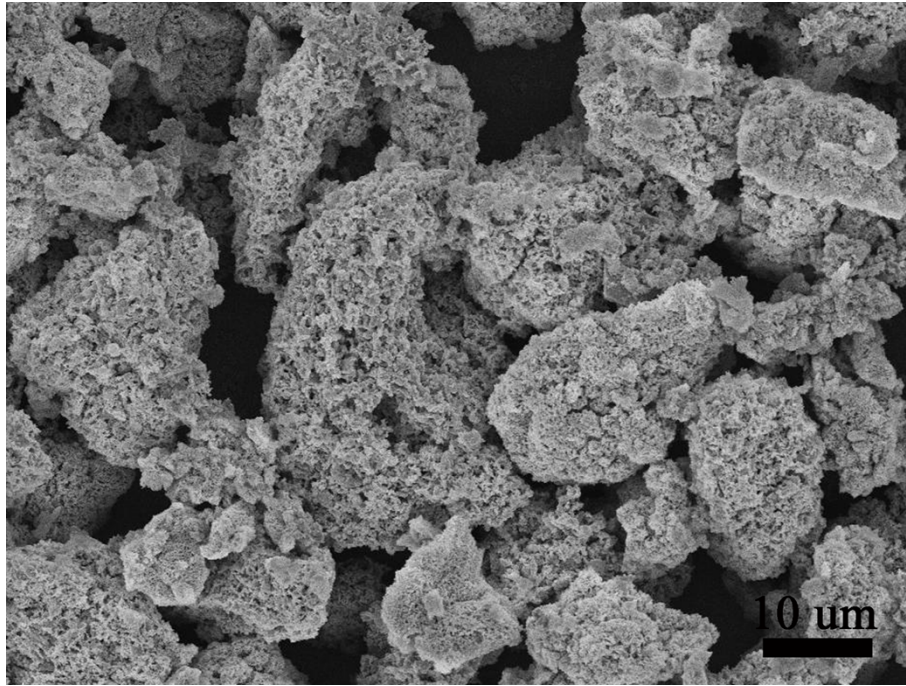

**Figure S1.** SEM image of the as-prepared nano-porous Si.

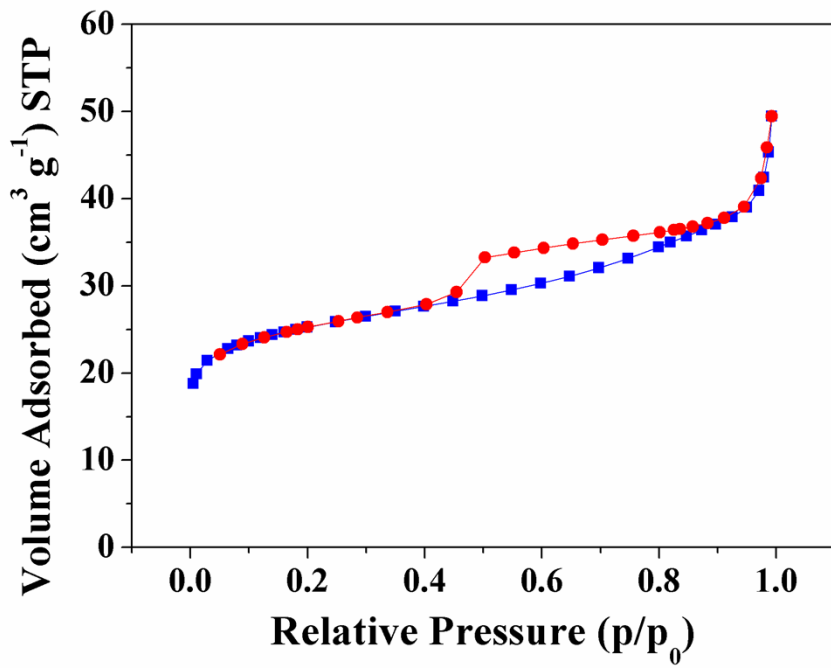

**Figure S2.** Nitrogen adsorption curves of the nano-porous Si powder.

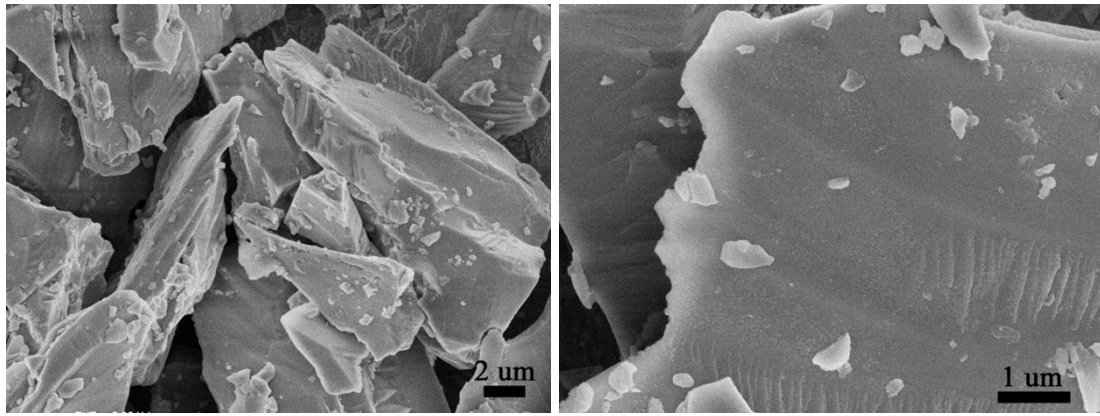

**Figure S3.** SEM image of the commercial bulk Si.

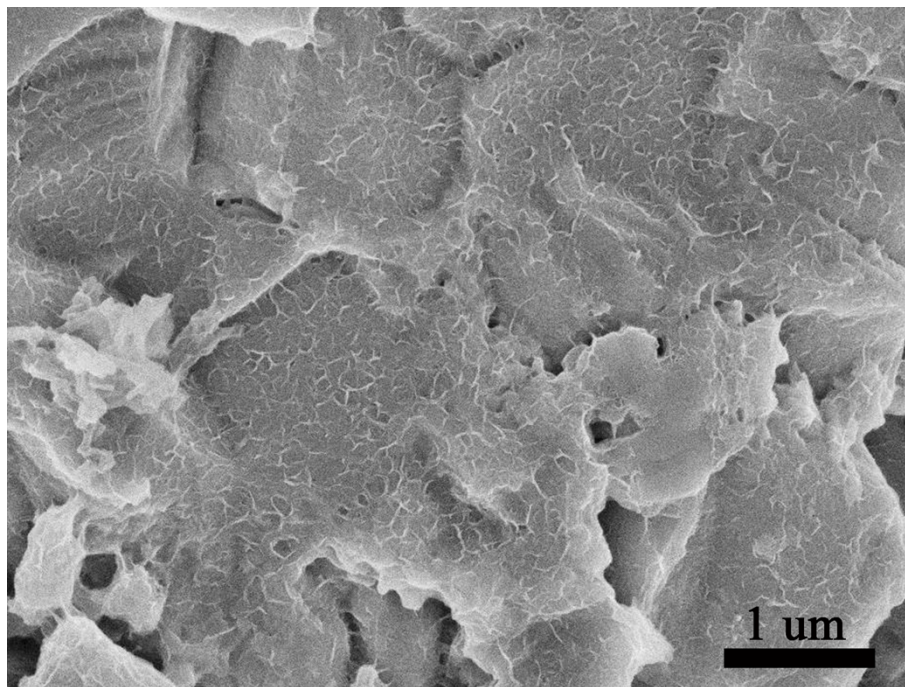

**Figure S4.** SEM image of the as-prepared  $\text{Mg}_2\text{Si}/\text{Mg}$  after the Mg-Si reaction.

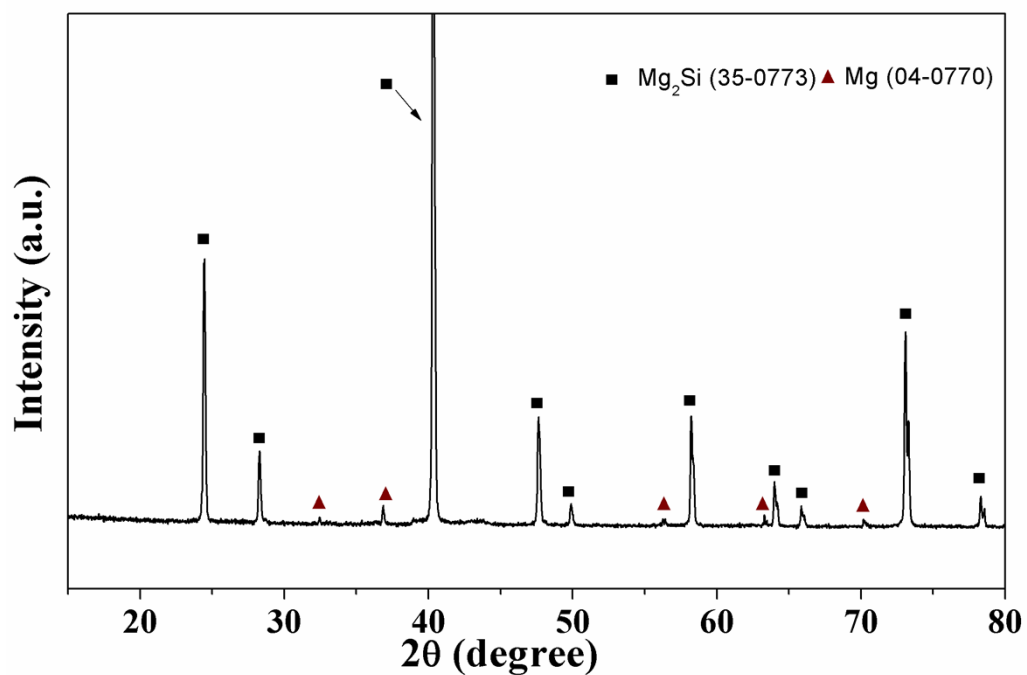

**Figure S5.** XRD patterns of as prepared powder before acid washing at air-oxidation temperatures of 400 °C for 10 h.

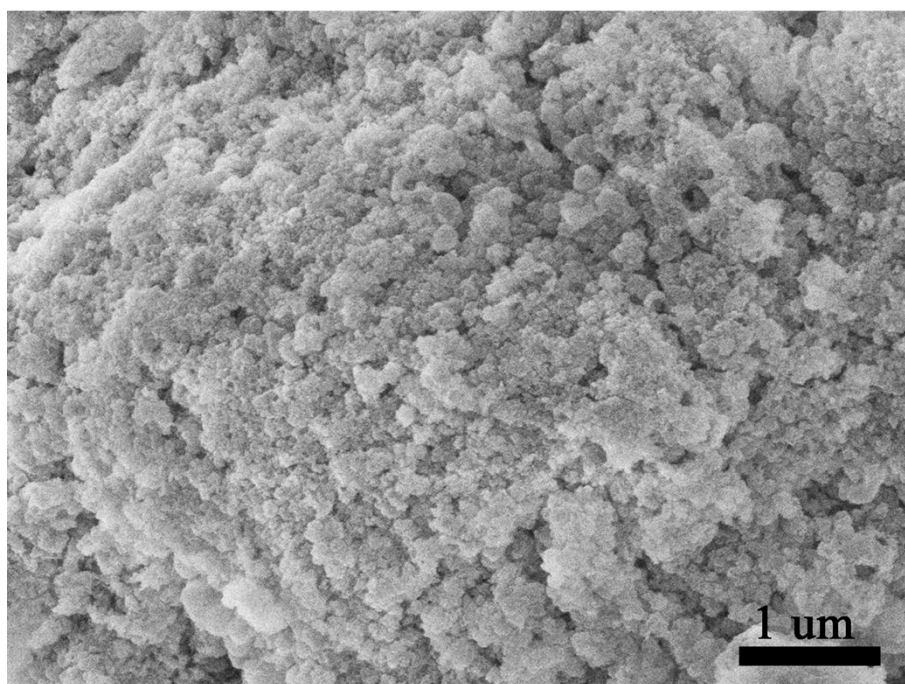

**Figure S6.** SEM image of the MgO/Si compound after oxidation process in air.

**Table S1.** The repeated experiments of nano-porous silicon and these corresponding conversion yields and tap density.

|          | <b>Commercial<br/>Bulk Si</b> | <b>After air<br/>oxidation</b> | <b>Porous<br/>Si</b> | <b>Yield</b> | <b>Tap density</b>       |
|----------|-------------------------------|--------------------------------|----------------------|--------------|--------------------------|
| <b>1</b> | 10.585 g                      | 42.24 g                        | 10.465 g             | 98.8 %       | 0.603 g cm <sup>-3</sup> |
| <b>2</b> | 11.653 g                      | 46.24 g                        | 11.261 g             | 96.6 %       | 0.579 g cm <sup>-3</sup> |
| <b>3</b> | 10.039 g                      | 39.68 g                        | 9.544 g              | 95.1 %       | 0.584 g cm <sup>-3</sup> |
| <b>4</b> | 10.927 g                      | 43.12 g                        | 9.898 g              | 90.6 %       | 0.628 g cm <sup>-3</sup> |
| <b>5</b> | 11.353 g                      | 42.00 g                        | 10.922 g             | 96.2 %       | 0.592 g cm <sup>-3</sup> |
